# Supplementary material
Source: PubMed Central journal article supplement (PMC10687709)
Supplement: NIHMS795506-supplement-3.pdf [file NIHMS795506-supplement-3.pdf]

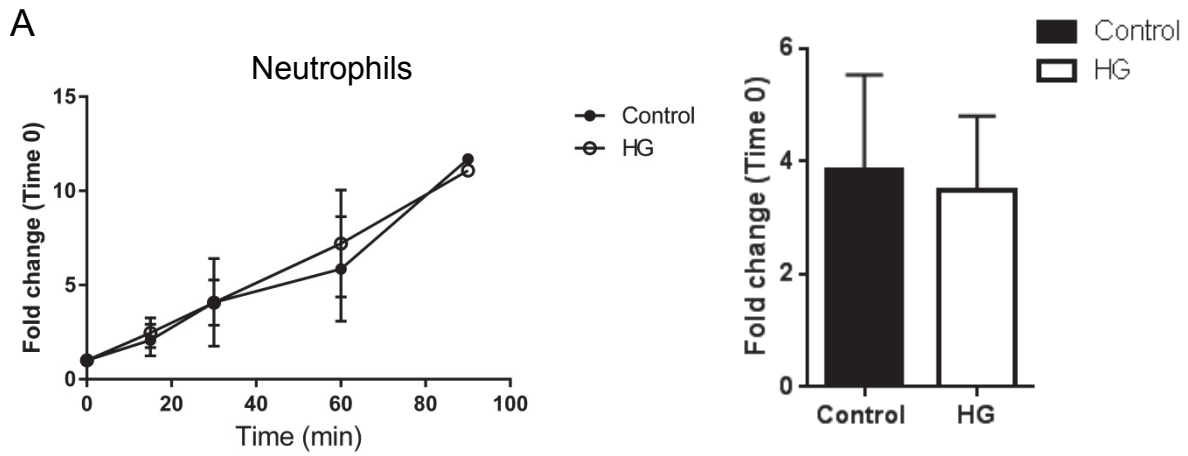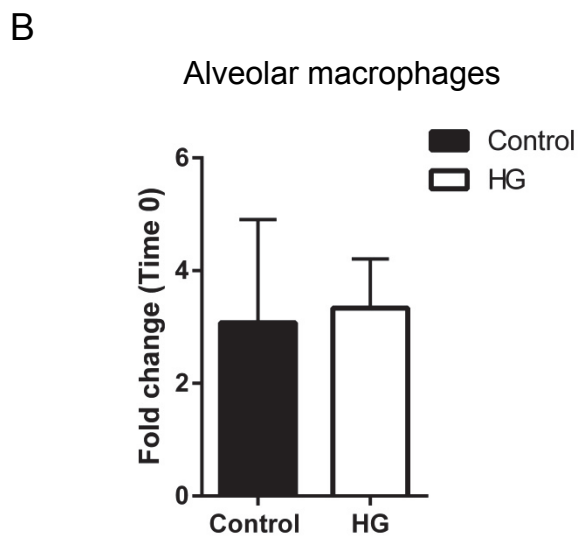

**Supplemental Fig. 3.** Bactericidal activity. (A) Neutrophils were infected with *K.pneumoniae* and CFU was quantified after 15, 30, 60 and 90 min (n=3). (B) Alveolar macrophages (AM) were infected with *K.pneumoniae* and CFU was quantified after 30 min (n=4). All experiments were repeated at least twice. Statistical differences were analyzed by Student's *t*-test.
