# Supplementary material
Source: PubMed Central journal article supplement (PMC10687709)
Supplement: NIHMS795506-supplement-4.pdf [file NIHMS795506-supplement-4.pdf]

Supplementary Table 1

| Gene  | Forward               | Reverse              |
|-------|-----------------------|----------------------|
| Cxcl1 | gctgggattcacctcaagaa  | aggtgcatcagagcagtct  |
| Cxcl2 | aagttgccttgaccctgaa   | aggcacatcaggtacgatcc |
| Il1b  | gcccacctctgtgactcat   | aggccacaggtatthtgcg  |
| Tnf   | tatggctcagggtccaactc  | ctcccttgcagaactcagg  |
| Il10  | catgggtcttggaagagaa   | cattcccagaggaattgcat |
| Tlr2  | tgctttcctgctggagattt  | tgtaacgcaacagcttcagg |
| Tlr4  | ggcagcaggtggaattgtat  | aggccccagagthttgttct |
| Tirap | cagatcccagctctaccaa   | agatccgtcagctaggcaaa |
| Gapdh | accagaagactgtggatgg   | cacattggggtaggaacac  |
| Tbp   | gaagctgcggtacaattccag | cccctgtacccttcaccaat |
